# Supplementary material for: The Integral Core Nutrient Matrix Causing Uterine Fibroid and the Associated Biochemical Roots
Source: Preprints.org preprint supplement (doi:10.20944/preprints202206.0208.v1), 2022-06-15
Supplement: Supplementary file 1 [file supplementary]

Archive with 2 entries (2 files):
- Appendix S1 Informed consent format.pdf
- Appendix S2 PreDesigned Questionnaire for the study.pdf
